# Supplementary material for: Fingerprints of a size-dependent crossover in the dimensionality of electronic conduction in Au-seeded Ge nanowires
Source: publisher site journal article supplement (doi:10.3762/bjnano.7.151), 2016-11-02
Supplement: Additional file 1 [file 2190-4286-7-151-S1.pdf]

**Supporting Information**

**for**

**Fingerprints of a size-dependent crossover in the dimensionality of electronic conduction in Au-seeded Ge nanowires**

Maria Kolešnik-Gray<sup>1</sup>, Gillian Collins<sup>2</sup>, Justin D. Holmes<sup>2</sup> and Vojislav Krstić<sup>\*1</sup>

Address: <sup>1</sup>Department of Physics, Friedrich-Alexander-University Erlangen-Nürnberg (FAU), Staudtstr. 7, 91058 Erlangen, Germany and <sup>2</sup>Materials Chemistry & Analysis Group, Department of Chemistry, University College Cork, Cork, Republic of Ireland

Email: Vojislav Krstić - vojislav.krstic@fau.de

\* Corresponding author

**Extraction of intrinsic electrical transport parameters from measurement**

**A. Nanowire conductivity**

Nanowire resistance is measured in a four-point probe configuration, and is given by  $R_{NW} = V_{4T} / I_d$  where  $V_{4T}$  is the voltage drop measured between the inner electrodes and  $I_d$  the current. For a NW of radius  $R$ , the *conductivity* is given by

$$\sigma_{NW} = \frac{1}{R_{NW}} \frac{L_C}{\pi R^2}, \quad (S1)$$

where  $L_C$  is the conduction channel length, defined as the distance between the outer edges of the four-point probe electrodes (cf. Ref [1] for more details).

## B. Carrier mobility

Charge carrier mobility of the NWs was measured via the field-effect where the number of charges in the conduction channel is externally controlled by the applied gate voltage  $V_G$ . The electrical response of a NW device is quantified by its *extrinsic transconductance*  $g_m$  which is found from the sub-threshold slope of a transfer curve at fixed source-drain voltage  $V_{SD}$ :

$$g_m \equiv \left. \frac{\partial I_d}{\partial V_G} \right|_{V_{sd}}. \quad (S2),$$

The *intrinsic NW transconductance* can be obtained by decoupling the device-specific contact resistances  $R_C$ :

$$g_{in} = g_m \frac{1 + \frac{R_C}{R_{NW}}}{1 - g_m R_C / 2}, \quad (S3)$$

assuming that both source- and drain-electrode contact resistances are equivalent.

The contact resistance in turn is measured in two point configuration, where the total device resistance is given by:  $R_{Tot} = R_{NW} + R_C$ .

The *intrinsic mobility* can thus be found using the expression:

$$\mu_{NW} = \frac{g_{in}}{V_{SD}} \frac{L_C^2}{C}, \quad (S4),$$

where the capacitance  $C$  of the NW to the gate electrode is described by:

$$C = 2\pi\epsilon_{SiO_2}\epsilon_0 \frac{L_C}{\ln(t_{ox}/R)} \quad (S5)$$

with  $t_{ox} = 300$  nm the SiO<sub>2</sub> thickness and  $\epsilon_{SiO_2}$  its dielectric constant.

## C. Carrier density

*Carrier density* can be calculated as:

$$N_d = \frac{\sigma_{NW}}{q\mu_{NW}} \quad (S6)$$

with  $q$  the electron charge.

### Dominant doping from surface-states

Proof for the circumstance that we have doping which is dominated by the surface-states of the nanowire is seen by the following consideration:

We work with Au-seeded VLS Ge nanowires. From the entire synthesis process [2], one could assume that Au atom dopants – which would then be volume-dopants – provide the charge-carriers which we have measured in our experiments.

However, Au dopants in Ge are deep-level acceptors with an activation energy of the order of 100 to 200 meV (e.g. [3-5]). That is, their ionisation probability at room temperature (our experimental condition) would be below 1%. Considering our experimentally measured carrier densities between  $10^{15}$  to  $10^{18}$   $\text{cm}^{-3}$ , we would have  $10^{17}$  to  $10^{20}$   $\text{cm}^{-3}$  Au-atom density in the Ge nanowires. This large amount of Au atoms however has not been detected in TEM of our nanowires (cf. Figure 1b; [2]) but would have been easily detectable by TEM techniques (see e.g. [6,7])

### **Weak switching behaviour of Ge NWs (transfer characteristics)**

The poor switching behaviour is typical for VLS synthesized Ge NWs and is a consequence of the generally high doping of the NWs through surface states up to  $10^{18}$   $\text{cm}^{-3}$  (several orders of magnitude higher than intrinsic Ge).

### **Supplementary References:**

1. Kolešnik-Gray, M.; Lutz, T.; Collins, G.; Biswas, S.; Holmes, J.D.; Krstić, V. *Appl. Phys. Lett.* **2013**, *103*, 153101.
2. Collins, G.; Kolešnik, M.; Krstić, V.; Holmes, J.D. *Chem. Mater.* **2010**, *22*, 5235-5243.
3. Woodbury, H.H. & Tyler, W.W. *Phys. Rev.* 1957, *105*, 84-92.4. Sze, S.M. *Physics of Semiconductor Devices*, 2<sup>nd</sup> ed.; Wiley 1981.
4. Dunlap, W.C. *Phys. Rev.* 1955, *97*, 614-629.
5. Chapter 5 in: Egerton, *Electron Energy-Loss in the Electron Microscope*, Ch. 5
6. Allen, J.E. et al. *Nature Nanotech.* **2008**, *8*, 168-173.
